# Supplementary material for: High-Impact Pain Predicts Incidence of Subjective and Objective Cognitive Decline
Source: Research Square preprint supplement (doi:10.21203/rs.3.rs-6149682/v1), 2025-03-25
Supplement: Supplementary file 1 [file f10595c3b9fd3b557e886cd2.docx]

**Supplementary Table 1. Logistic Regression for Subjective Cognitive Decline Including APOE Genotype (N=10,274)**

|  | **Multivariablea**  **aOR (95% CI)** | **P-value** | **Corrected P-valueb** |
| --- | --- | --- | --- |
| High-impact pain vs no pain | 1.50 (1.31, 1.73) | <0.0001 | 0.0003 |
| High-impact pain vs low-impact pain | 1.44 (1.18, 1.78) | 0.001 | 0.002 |
| Low-impact pain vs no pain | 1.04 (0.89, 1.22) | 0.617 | 0.590 |

aAdjusted for sample weights and stratified cluster design, demographics (age, race, Hispanic ethnicity, sex), education (years), comorbidity index, depressive symptoms, and APOe4 status.

b False discovery rate-adjusted p-value

**Supplementary Table 2. Cox Proportional Hazards Regressions for Subjective Cognitive Decline Including APOE Genotype (N=8,160)**

|  | **Multivariablea**  **aHR (95% CI)** | **P-value** | **Corrected P-valueb** |
| --- | --- | --- | --- |
| High-impact pain vs no pain | 1.29 (1.16, 1.42) | <0.0001 | 0.0003 |
| High-impact pain vs low-impact pain | 1.09 (0.96, 1.25) | 0.181 | 0.170 |
| Low-impact pain vs no pain | 1.18 (1.04, 1.32) | 0.009 | 0.011 |

a Adjusted for sample weights and stratified cluster design, demographics (age, race, Hispanic ethnicity, sex), education, comorbidity index, and APOEe4 status.

b False discovery rate-adjusted p-value
